# Supplementary material for: Comprehensive Investigation on Controlling for CT Imaging Variabilities in Radiomics Studies
Source: PubMed Central journal article supplement (PMC6115360; doi:10.1038/s41598-018-31509-z), 2018-08-29
Supplement: 41598_2018_31509_MOESM1_ESM.pdf [file 41598_2018_31509_MOESM1_ESM.pdf]

## SUPPLEMENTARY MATERIAL

### Comprehensive Investigation on Controlling for Inter-scanner Variabilities in Radiomics

#### Studies

Rachel B. Ger<sup>1,2\*</sup>, Shouhao Zhou<sup>2,3</sup>, Pai-Chun Melinda Chi<sup>1</sup>, Hannah J. Lee<sup>1</sup>, Rick R. Layman<sup>2,4</sup>, A. Kyle Jones<sup>2,4</sup>, David L. Goff<sup>5</sup>, Clifton D. Fuller<sup>2,6</sup>, Rebecca M. Howell<sup>1,2</sup>, Heng Li<sup>1,2</sup>, R. Jason Stafford<sup>2,4</sup>, Laurence E. Court<sup>1,2,4</sup>, Dennis S. Mackin<sup>1,2</sup>

<sup>1</sup>Department of Radiation Physics, The University of Texas MD Anderson Cancer Center, Houston, Texas

<sup>2</sup>MD Anderson Cancer Center UTHealth Science Center at Houston Graduate School of Biomedical Sciences, Houston, Texas

<sup>3</sup>Department of Biostatistics, The University of Texas MD Anderson Cancer Center, Houston, Texas

<sup>4</sup>Department of Imaging Physics, The University of Texas MD Anderson Cancer Center, Houston, Texas

<sup>5</sup>Medical & Radiation Physics, Inc., San Antonio, Texas

<sup>6</sup>Division of Radiation Oncology, The University of Texas MD Anderson Cancer Center, Houston, Texas

\*Corresponding author: [rbger@mdanderson.org](mailto:rbger@mdanderson.org)

## Pearson Correlation of Feature Value with Image Thickness

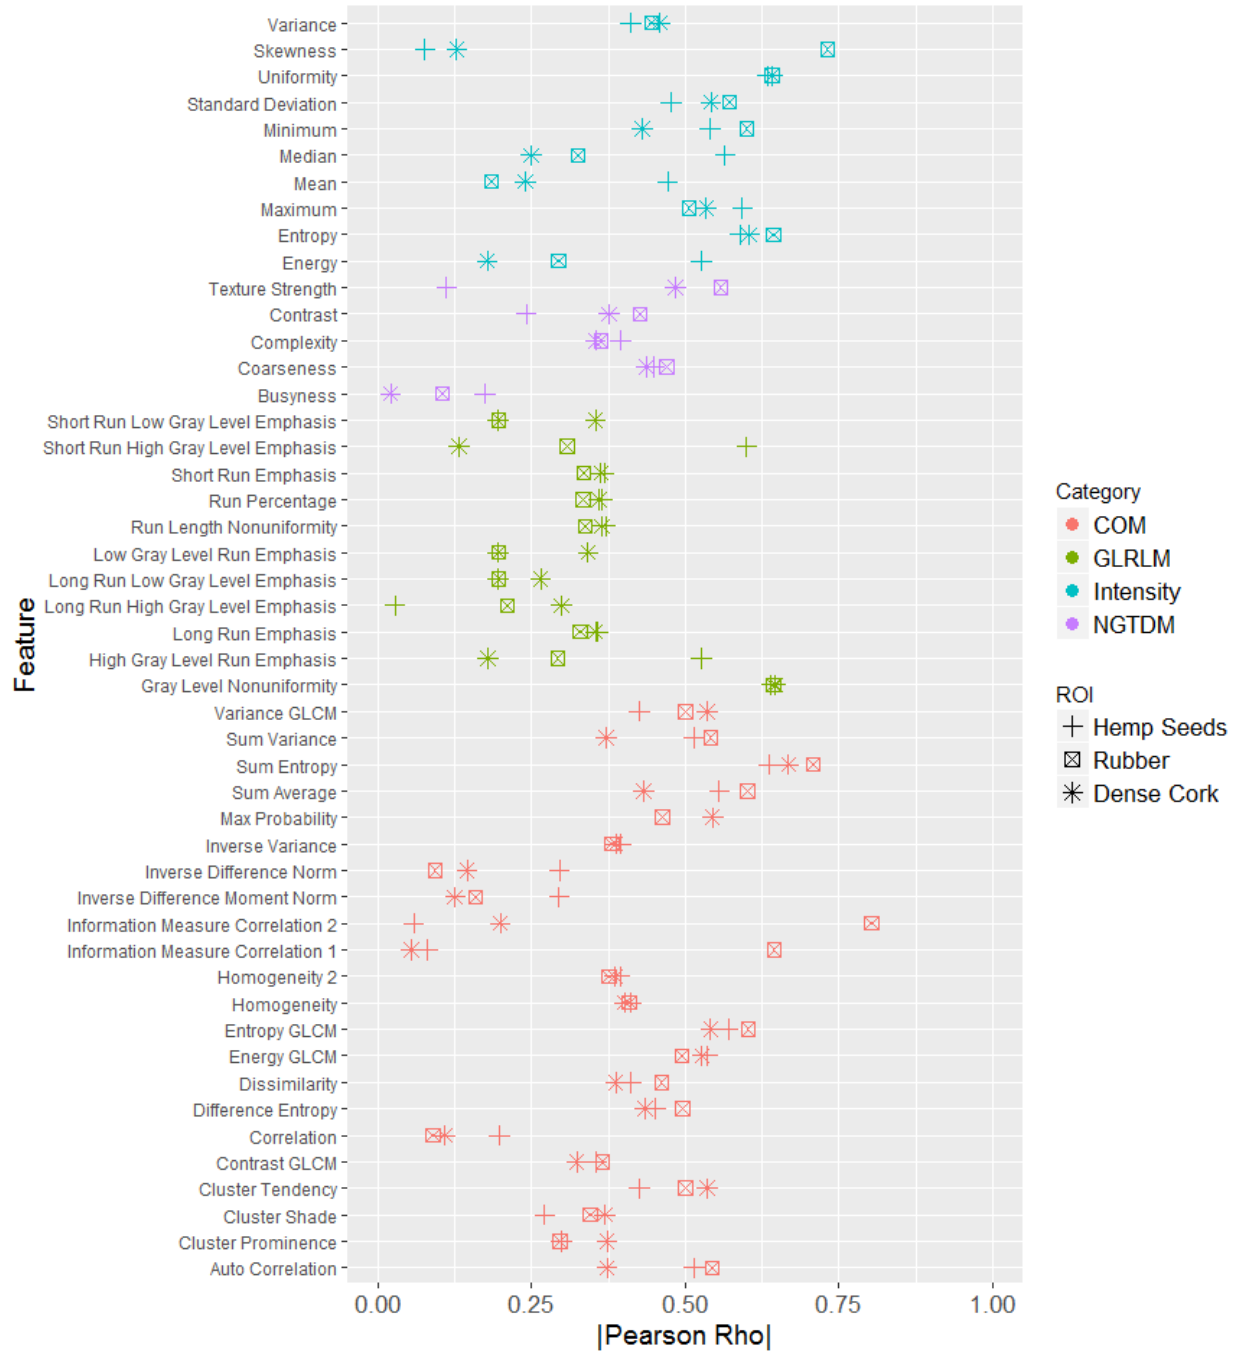

**Supplemental Figure 1.** Absolute value of the Pearson correlation rho for the correlation between feature value and image thickness for each region of interest (ROI). Each ROI is a different shape. Each category of feature is a different color. The correlation varies between and within features depending on

the ROI. COM: gray level co-occurrence matrix, GLCM: gray level co-occurrence (used when there are features with the same name in different categories to differentiate them), GLRLM: gray level run length matrix, NGTDM: neighborhood gray tone difference matrix.

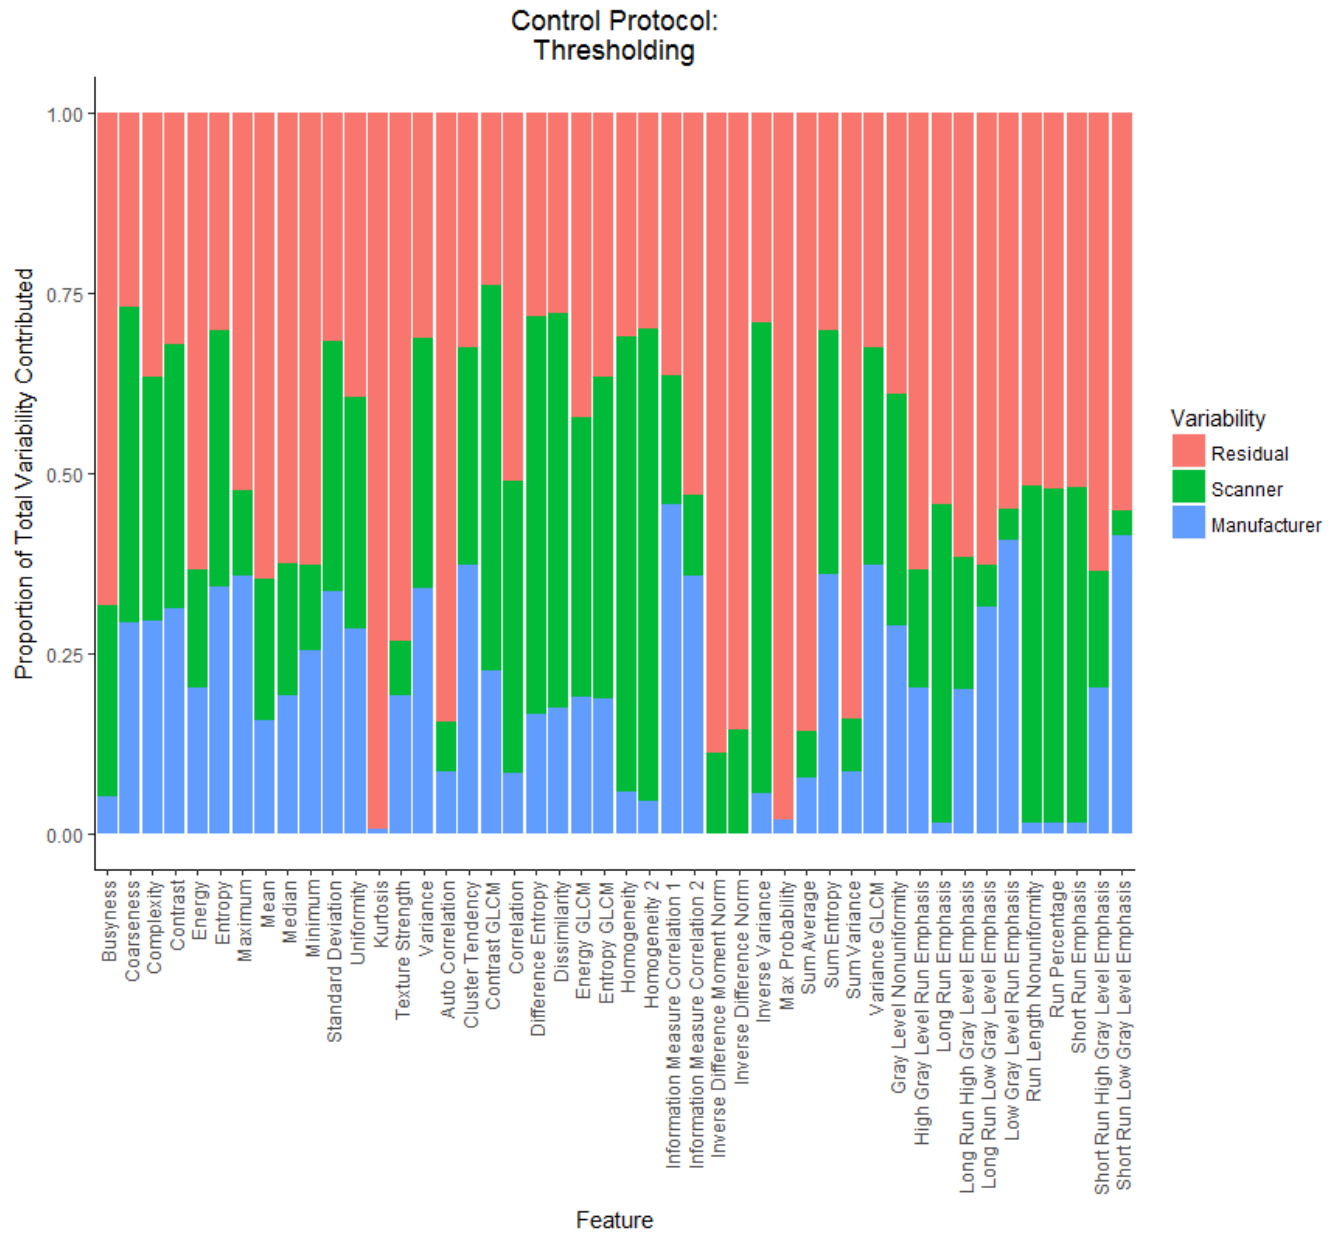

**Supplemental Figure 2.** Bar plots of the relative contribution of the scanner wise variability, manufacturer wise variability, and residual variability for each feature using thresholding calculated on the control protocol.

### Control Protocol: Thresholding and Smoothing

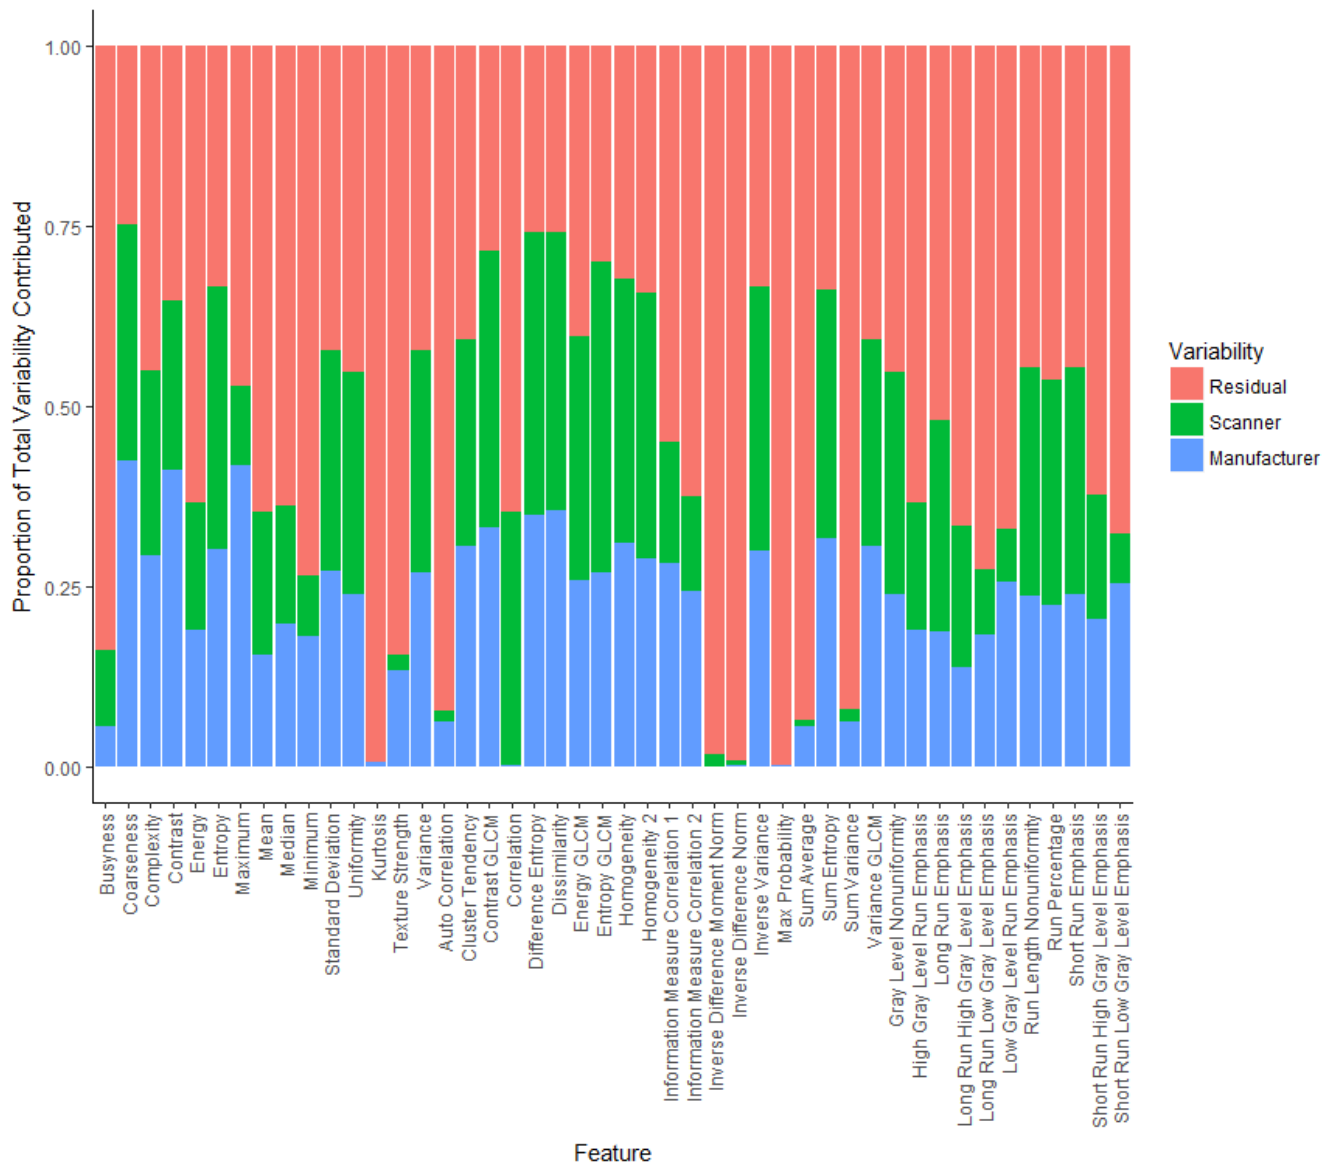

**Supplemental Figure 3.** Bar plots of the relative contribution of the scanner wise variability, manufacturer wise variability, and residual variability for each feature using thresholding and smoothing calculated on the control protocol.

Control Protocol:  
Thresholding, Smoothing, and Bit Depth Rescaling

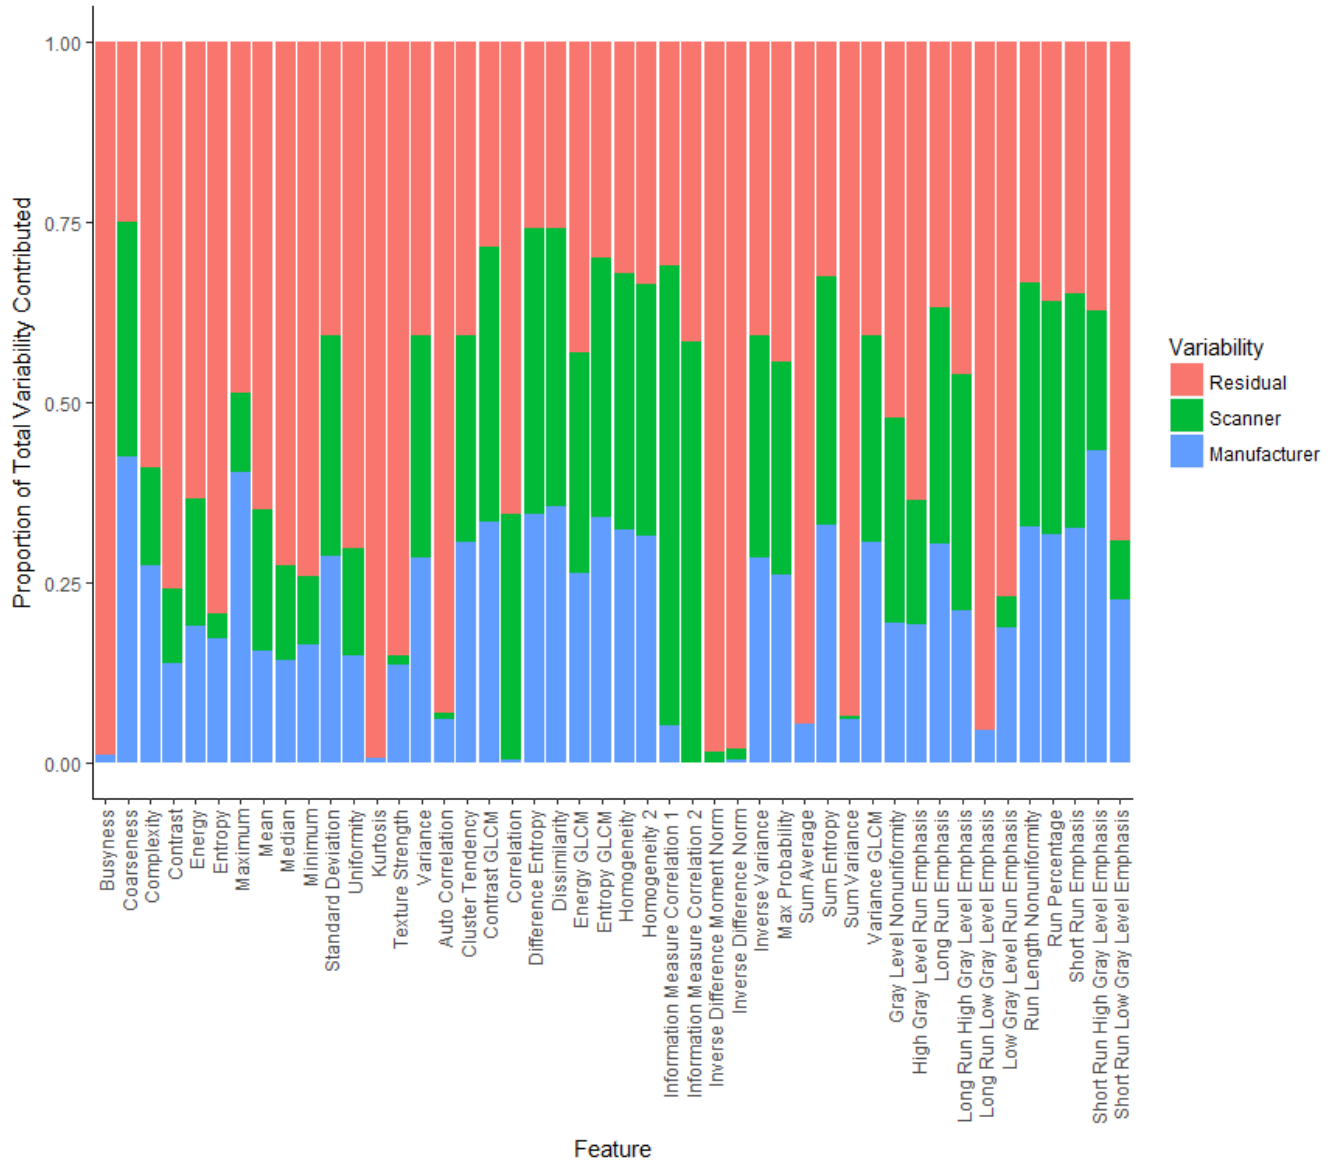

**Supplemental Figure 4.** Bar plots of the relative contribution of the scanner wise variability, manufacturer wise variability, and residual variability for each feature using thresholding, smoothing, and bit depth rescaling calculated on the control protocol.

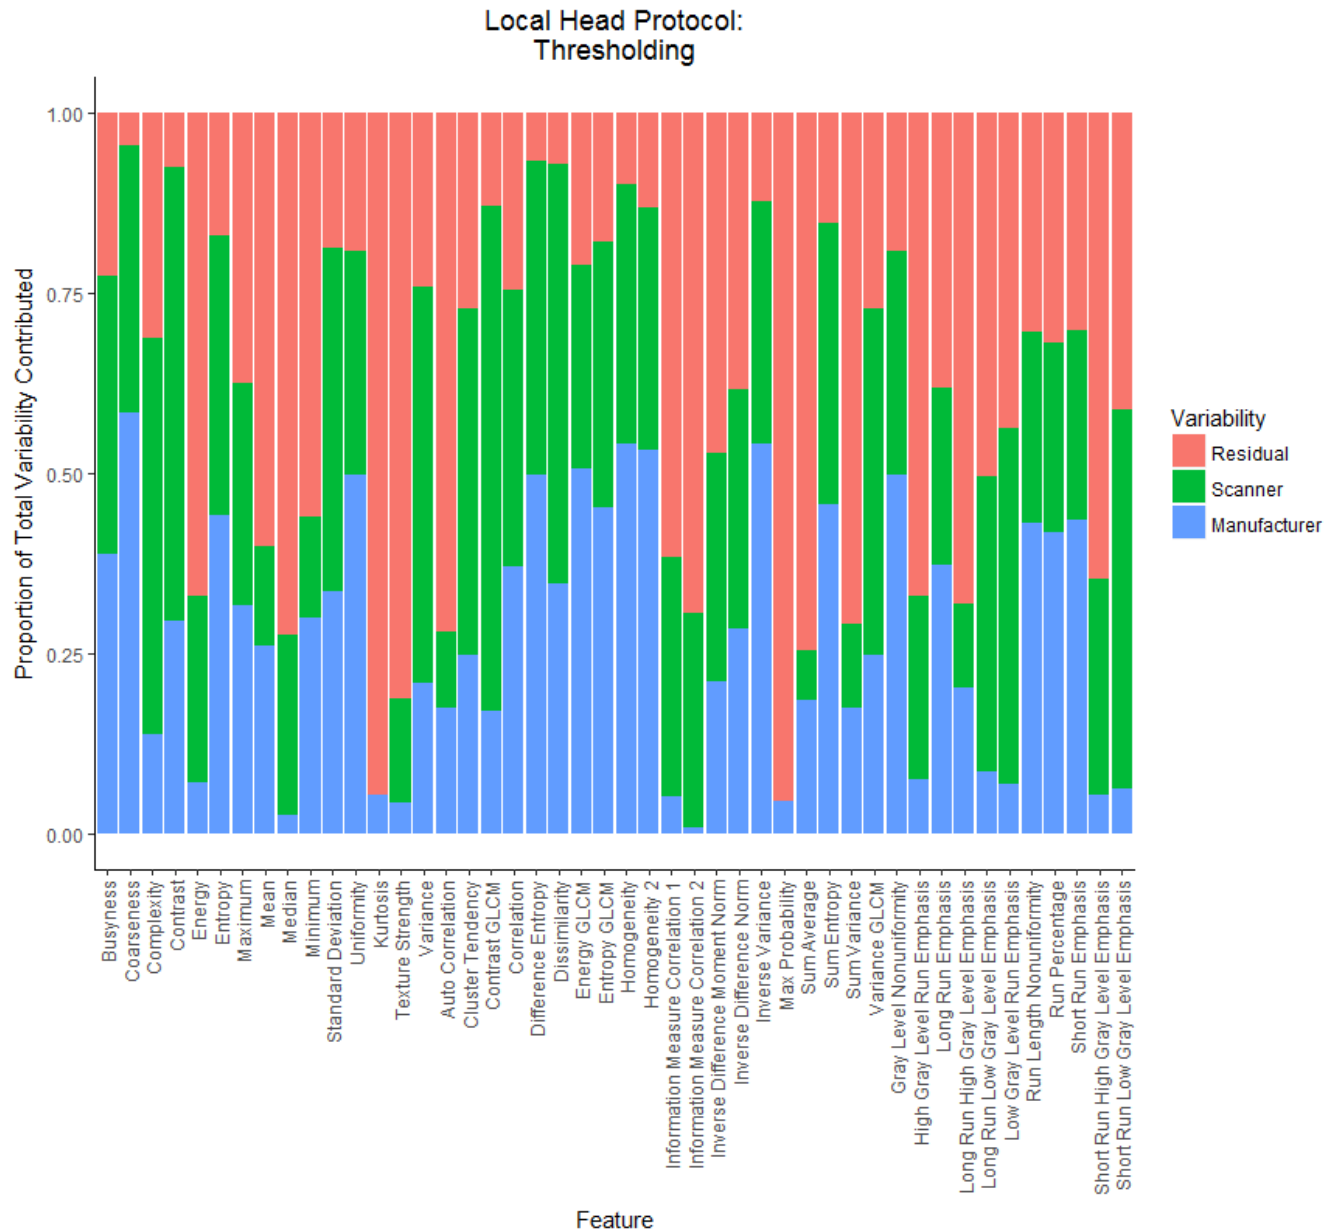

**Supplemental Figure 5.** Bar plots of the relative contribution of the scanner wise variability, manufacturer wise variability, and residual variability for each feature using thresholding calculated on the local head protocol.

### Local Head Protocol: Thresholding and Smoothing

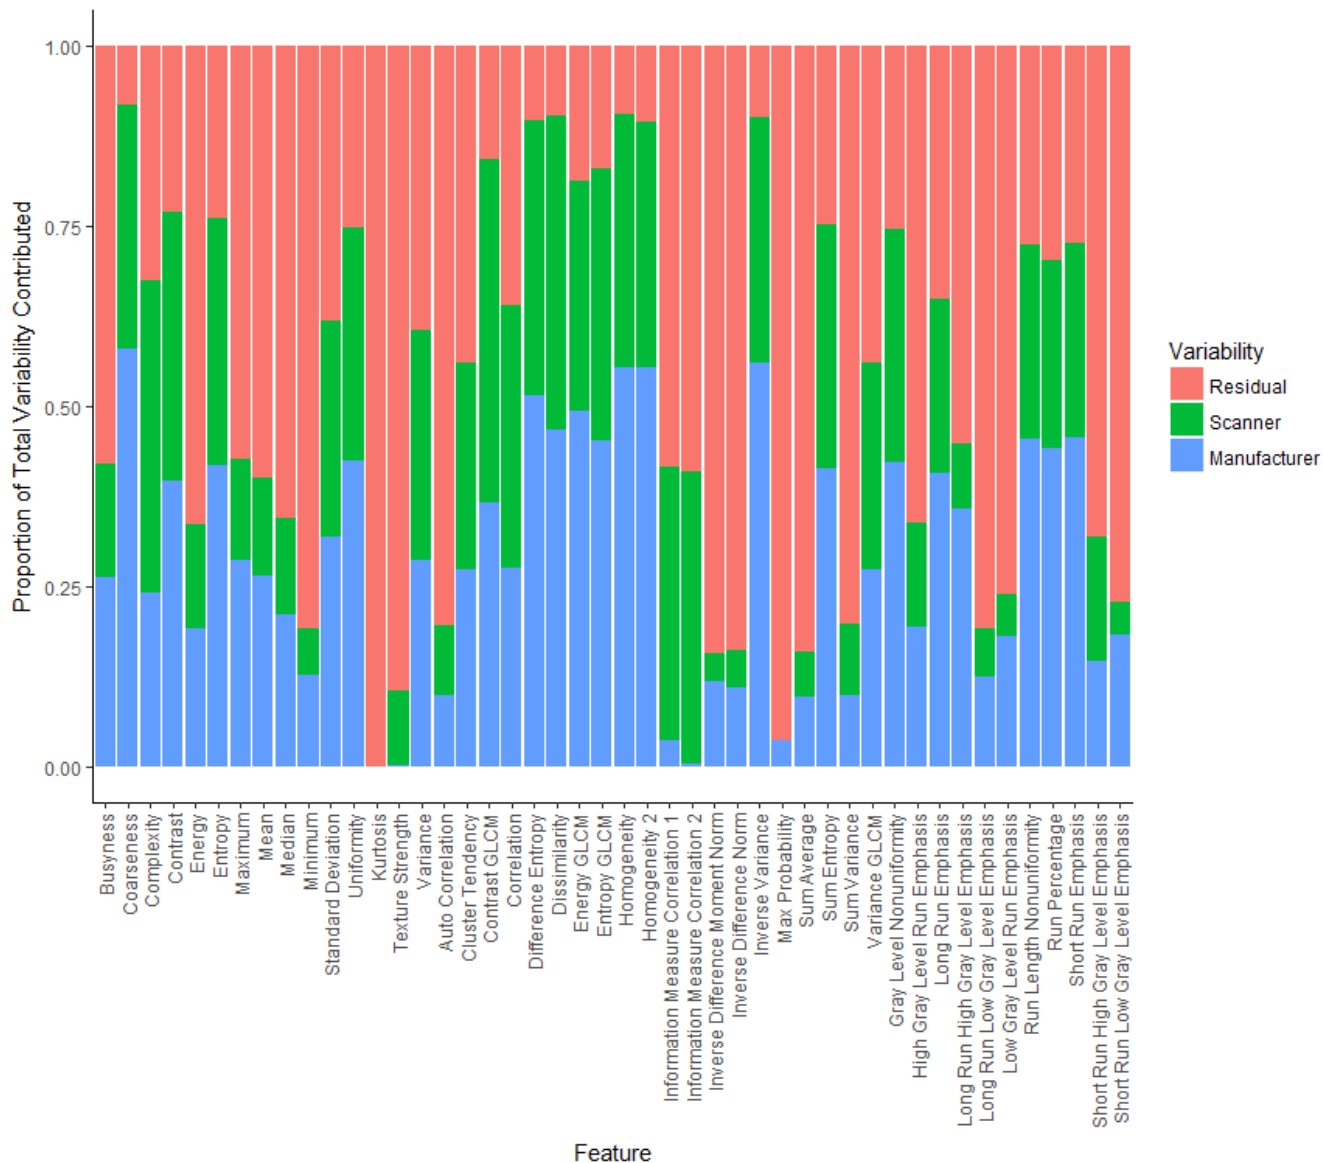

**Supplemental Figure 6.** Bar plots of the relative contribution of the scanner wise variability, manufacturer wise variability, and residual variability for each feature using thresholding and smoothing calculated on the local head protocol.



Local Head Protocol:  
Thresholding, Smoothing, and Bit Depth Rescaling

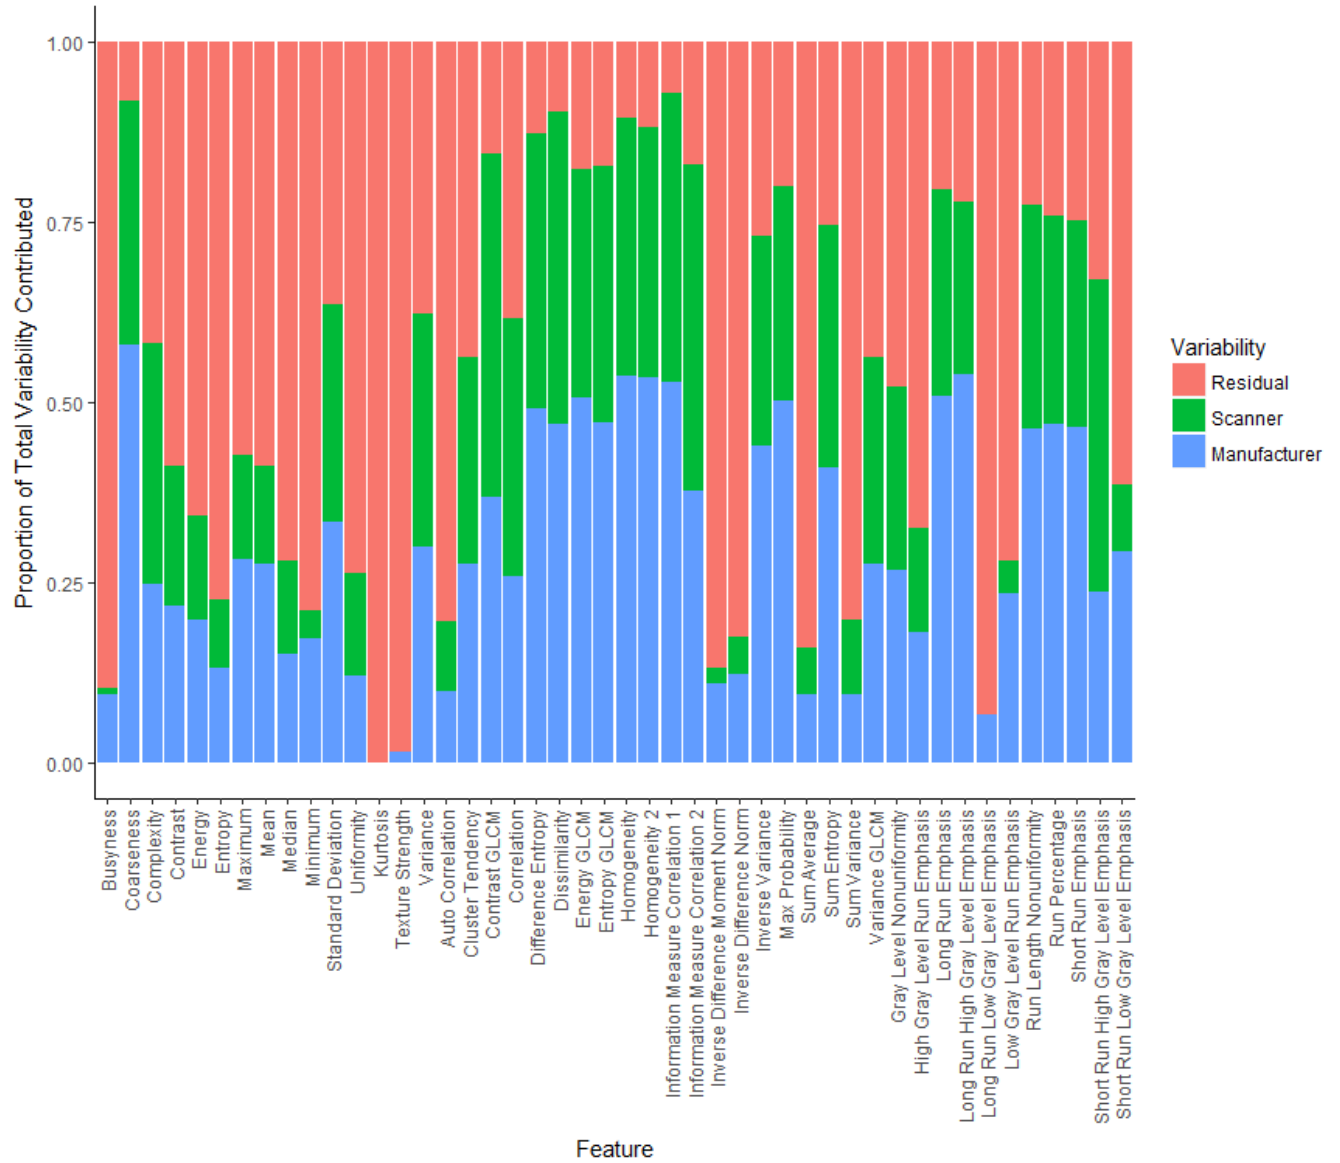

**Supplemental Figure 7.** Bar plots of the relative contribution of the scanner wise variability, manufacturer wise variability, and residual variability for each feature using thresholding, smoothing, and bit depth rescaling calculated on the local head protocol.

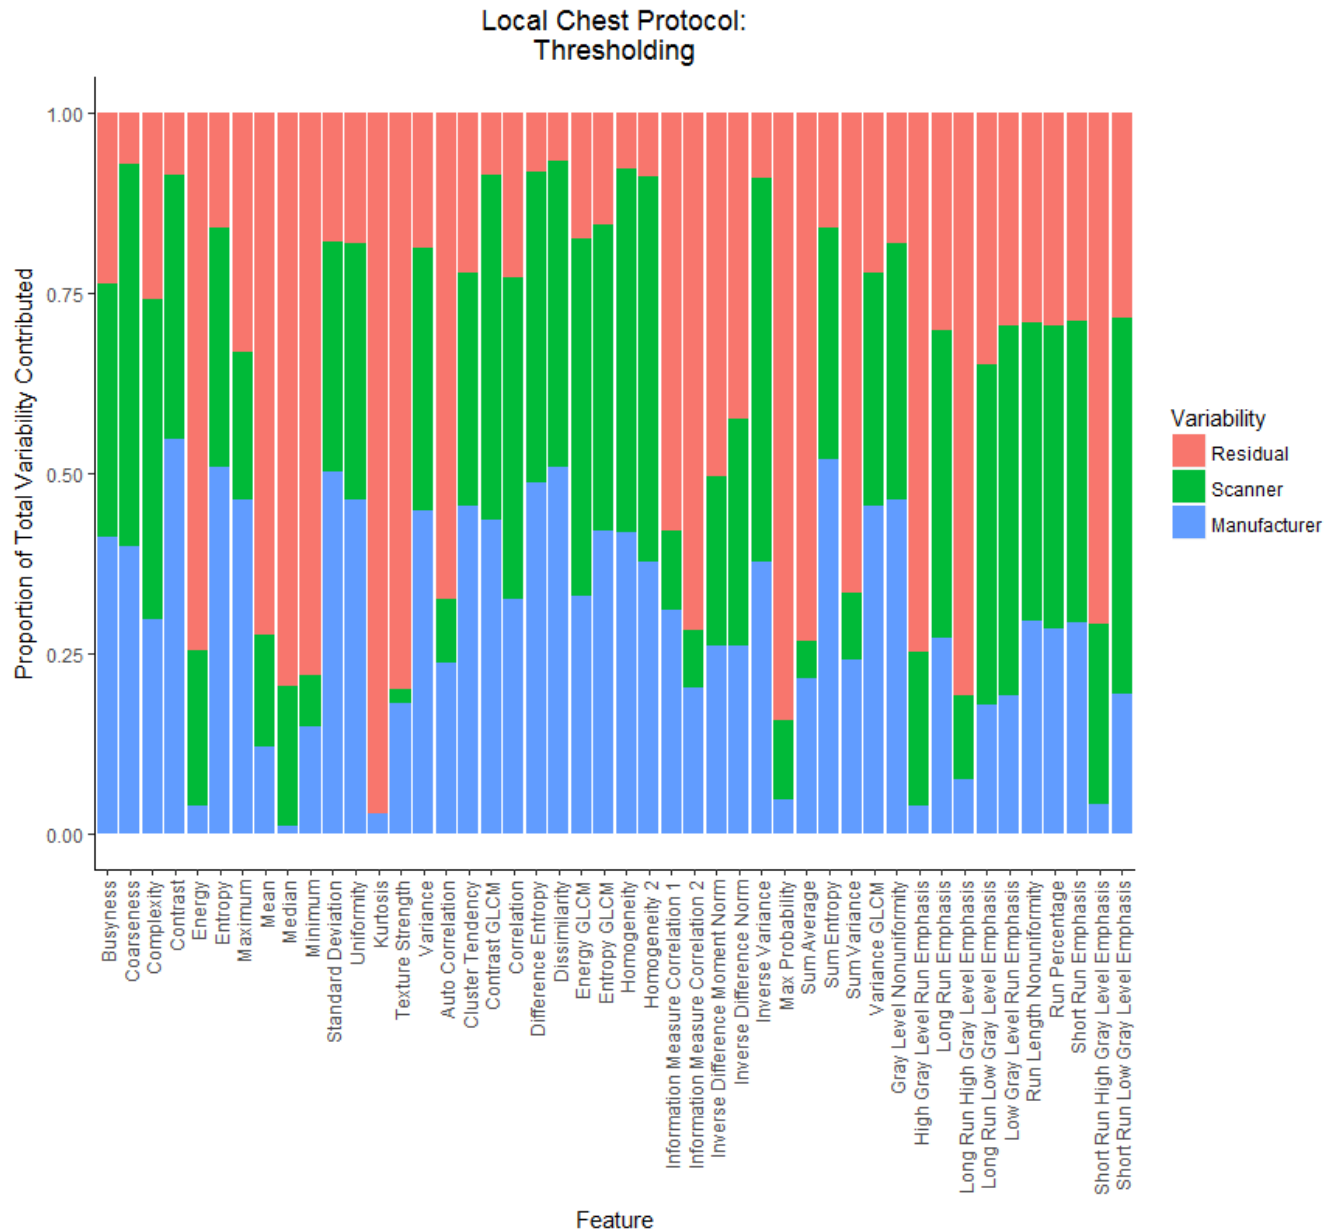

**Supplemental Figure 8.** Bar plots of the relative contribution of the scanner wise variability, manufacturer wise variability, and residual variability for each feature using thresholding calculated on the local chest protocol.

### Local Chest Protocol: Thresholding and Bit Depth Rescaling

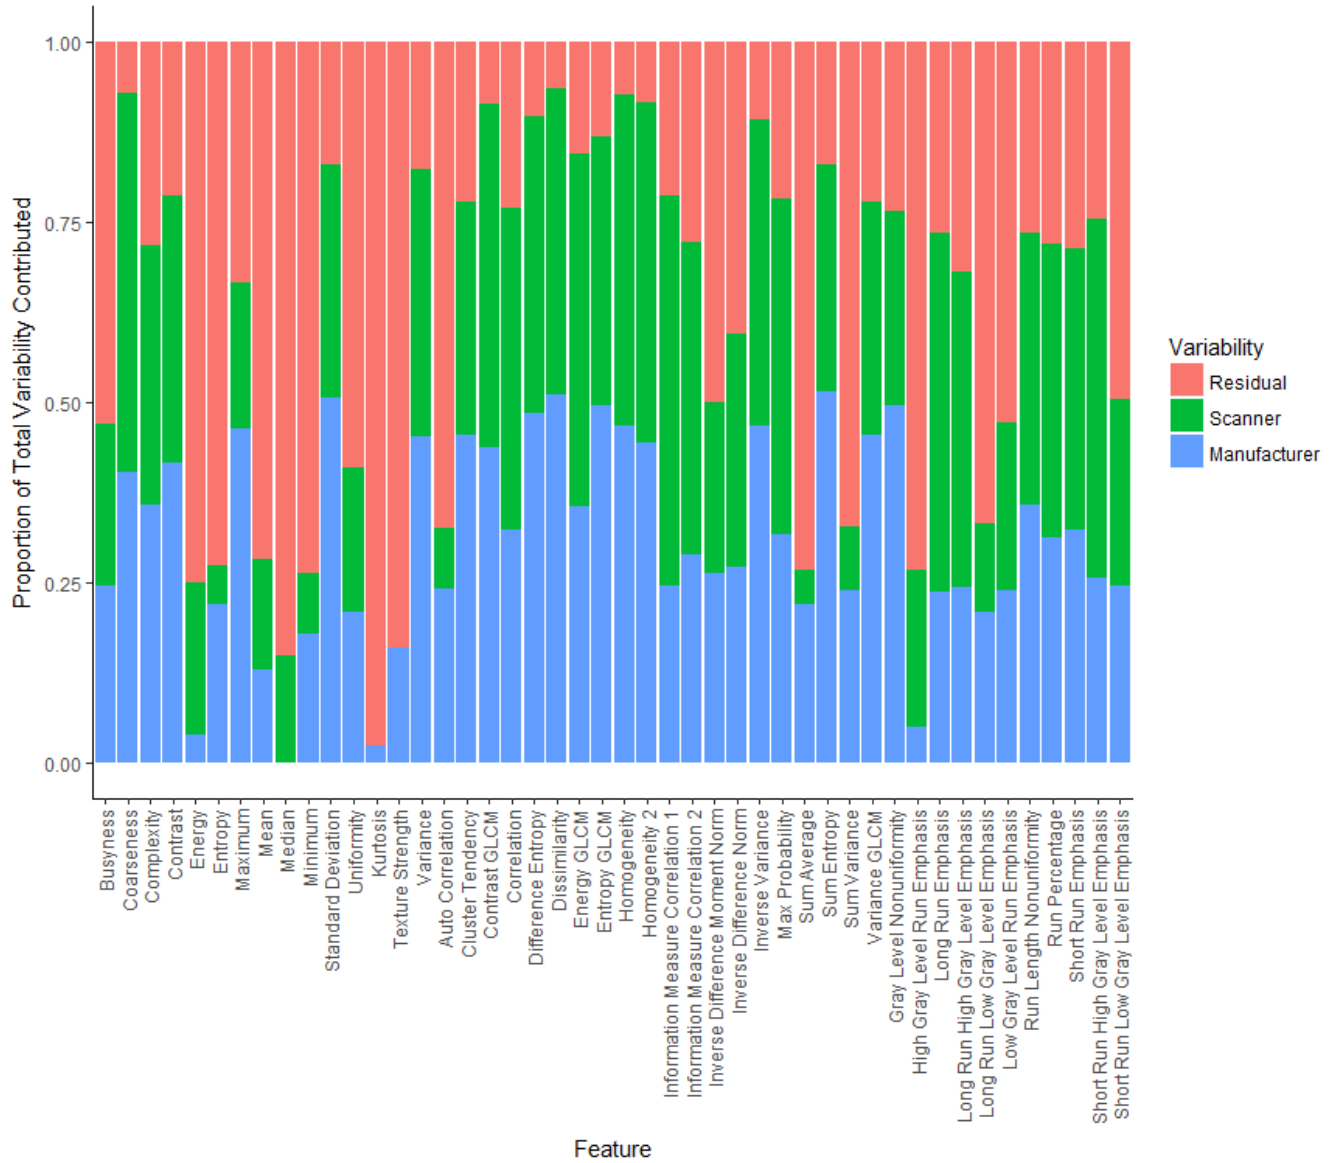

**Supplemental Figure 9.** Bar plots of the relative contribution of the scanner wise variability, manufacturer wise variability, and residual variability for each feature using thresholding and bit depth rescaling calculated on the local chest protocol.

### Local Chest Protocol: Thresholding and Smoothing

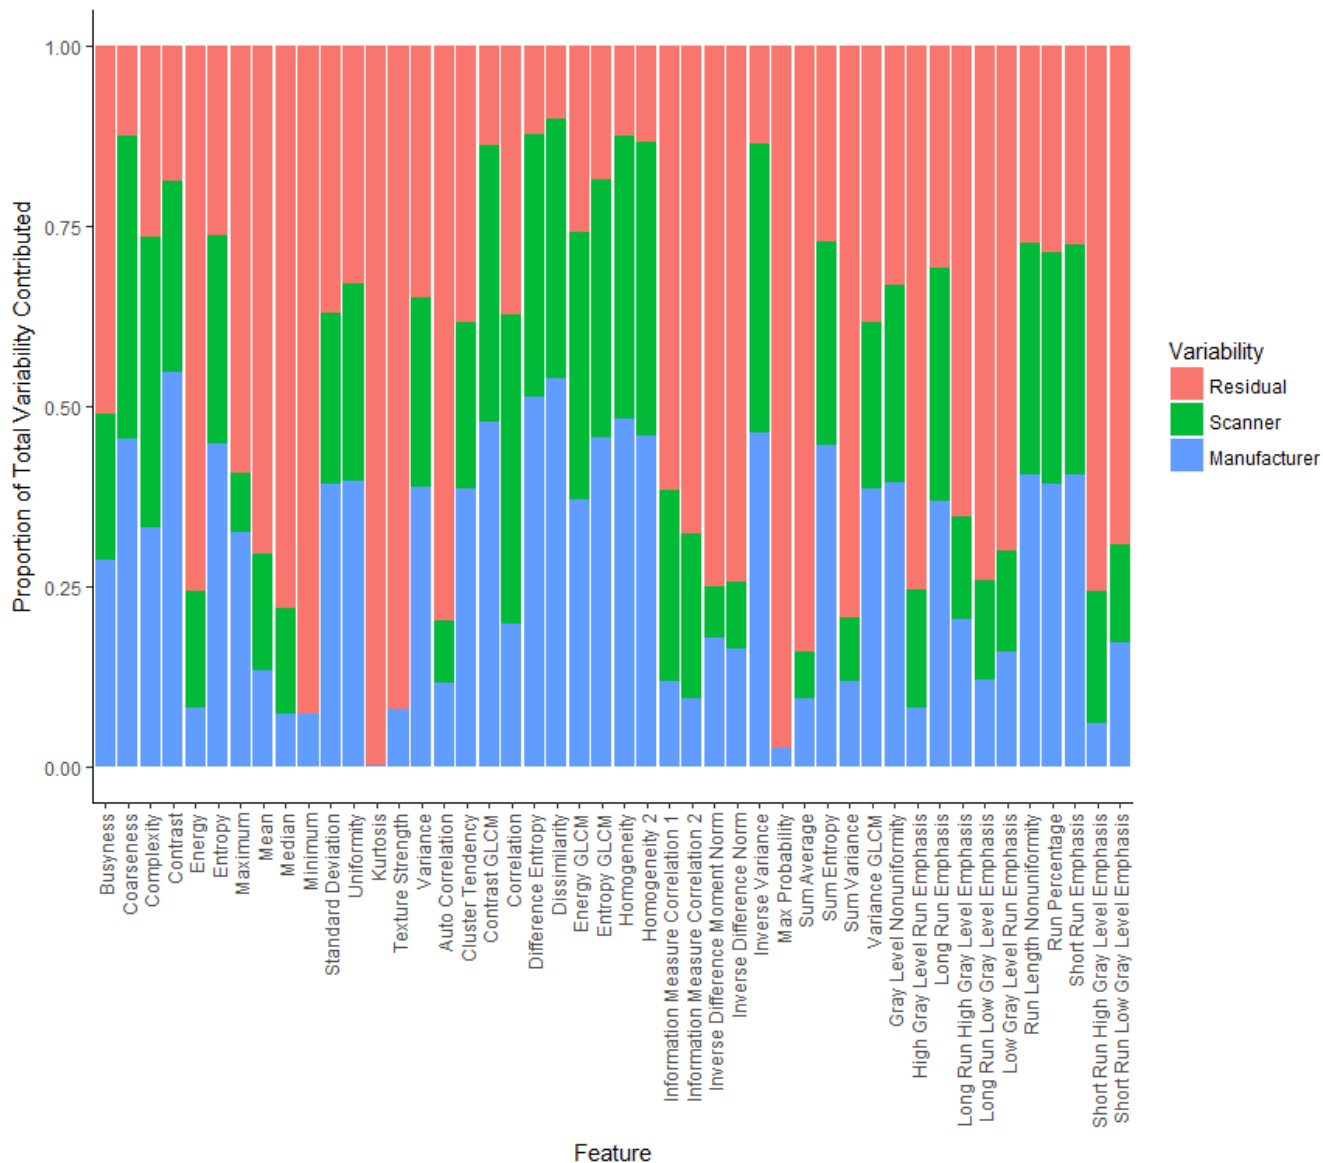

**Supplemental Figure 10.** Bar plots of the relative contribution of the scanner wise variability, manufacturer wise variability, and residual variability for each feature using thresholding and smoothing calculated on the local chest protocol.

### Local Chest Protocol: Thresholding, Smoothing, and Bit Depth Rescaling

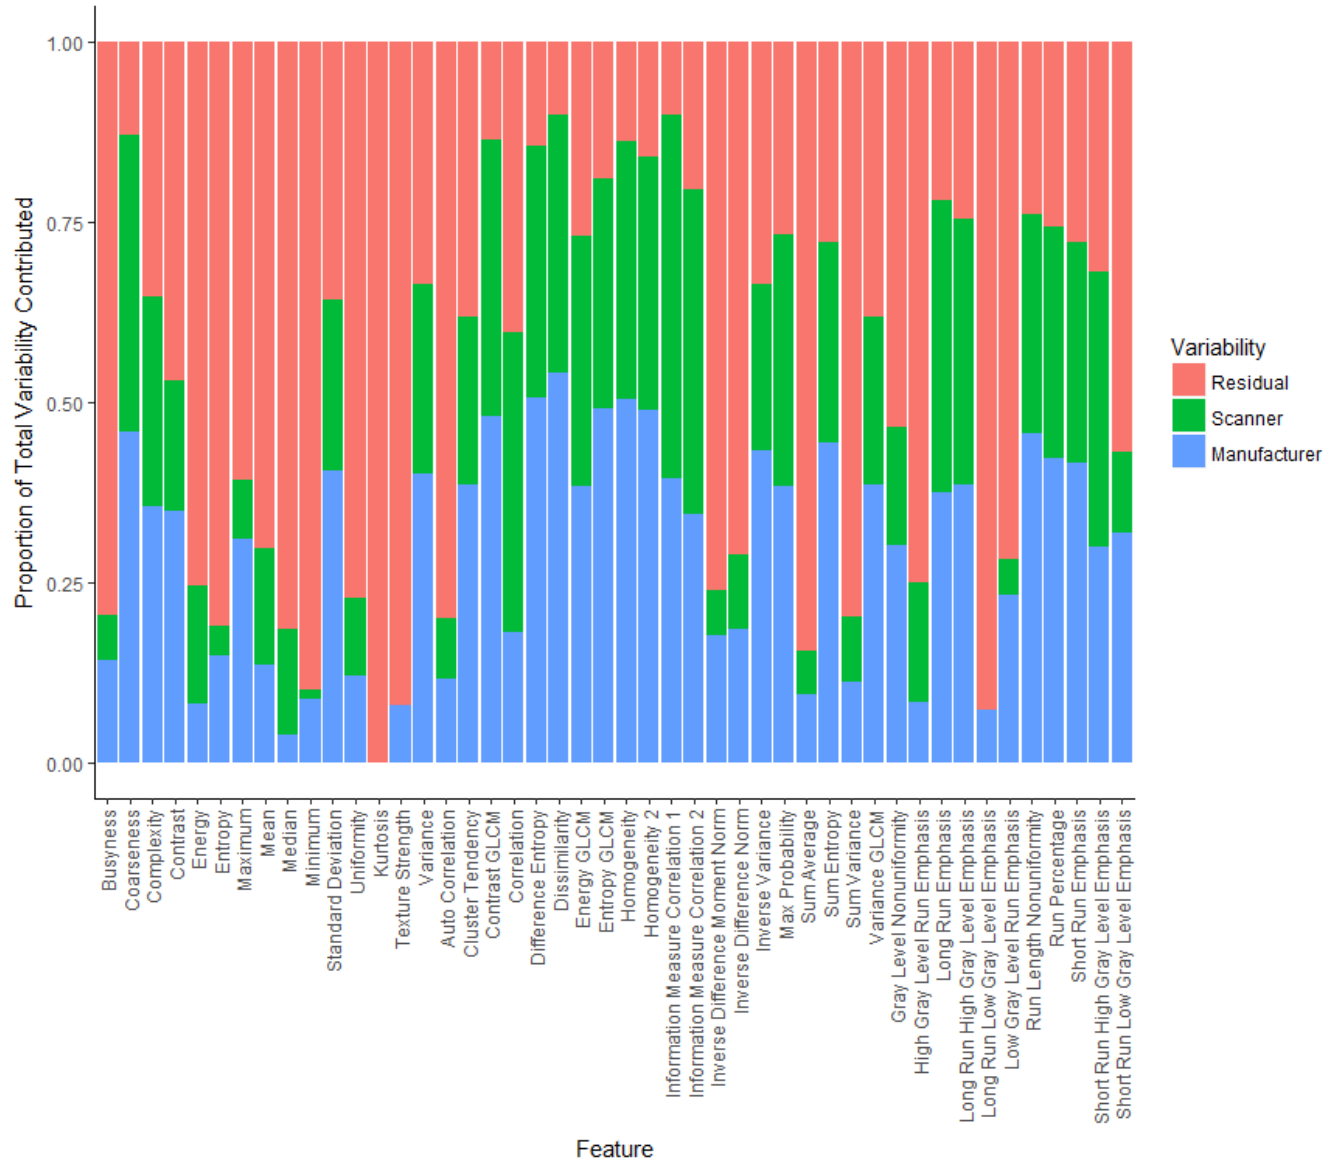

**Supplemental Figure 11.** Bar plots of the relative contribution of the scanner wise variability, manufacturer wise variability, and residual variability for each feature using thresholding, smoothing, and bit depth rescaling calculated on the local chest protocol.

**Table 1. P-values for One Sided Pairwise T-tests between Control and Local Protocol Scans**

|                   | Control vs Chest Protocol |                            |                                      |                                                  | Control vs Head Protocol |                            |                                      |                                                  |
|-------------------|---------------------------|----------------------------|--------------------------------------|--------------------------------------------------|--------------------------|----------------------------|--------------------------------------|--------------------------------------------------|
|                   | Thresholding              | Thresholding and Smoothing | Thresholding and Bit Depth Rescaling | Thresholding, Smoothing, and Bit Depth Rescaling | Thresholding             | Thresholding and Smoothing | Thresholding and Bit Depth Rescaling | Thresholding, Smoothing, and Bit Depth Rescaling |
| $\sigma_\beta$    | 0.037                     | 0.032                      | 0.00073                              | 0.0042                                           | 0.035                    | 0.54                       | 0.0015                               | 0.0024                                           |
| $\sigma_\gamma$   | 0.027                     | 0.018                      | 0.00022                              | 0.00049                                          | 0.0072                   | 0.90                       | 0.0000093                            | 0.000097                                         |
| $\sigma_\epsilon$ | 0.038                     | 0.046                      | 0.0050                               | 0.0049                                           | 0.036                    | 0.42                       | 0.0014                               | 0.073                                            |

$\sigma_\beta$ : scanner-wise variability,  $\sigma_\gamma$ : manufacturer-wise variability,  $\sigma_\epsilon$ : residual variability

**Table 2. P-values for Pairwise T-tests between Variability from Model with All Manufacturers vs GE Only**

|                                                   | Scanner-wise Variability |                      |                     | Residual variability |                      |                     |
|---------------------------------------------------|--------------------------|----------------------|---------------------|----------------------|----------------------|---------------------|
|                                                   | Control Protocol         | Local Chest Protocol | Local Head Protocol | Control Protocol     | Local Chest Protocol | Local Head Protocol |
| Thresholding                                      | 0.088                    | 0.084                | 0.076               | 0.29                 | 0.070                | 0.071               |
| Thresholding and Smoothing                        | 0.45                     | 0.0078               | 0.0024              | 0.051                | 0.13                 | 0.48                |
| Thresholding and Bit Depth Resampling             | 0.93                     | 0.21                 | 0.025               | 0.0022               | 0.028                | 0.0081              |
| Thresholding, Smoothing, and Bit Depth Resampling | 0.049                    | 0.00022              | 0.0016              | 0.0024               | 0.083                | 0.0014              |

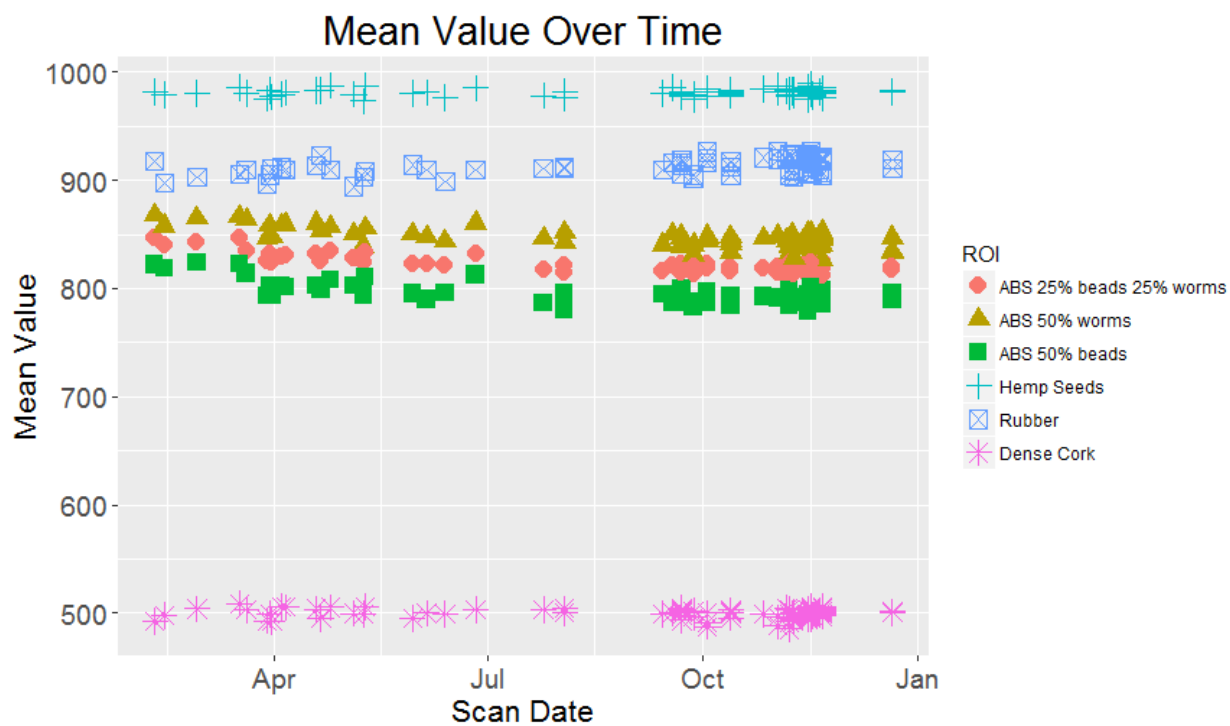

**Supplemental Figure 12.** Mean value over time for each ROI, shown as a different colored and shaped point. The three cartridges with ABS demonstrated a downward trend with time while the other cartridges did not demonstrate any trend with time.



### Percentage of Features Outside 1/3 Scaled Patient Standard Deviation Using All Robust Features

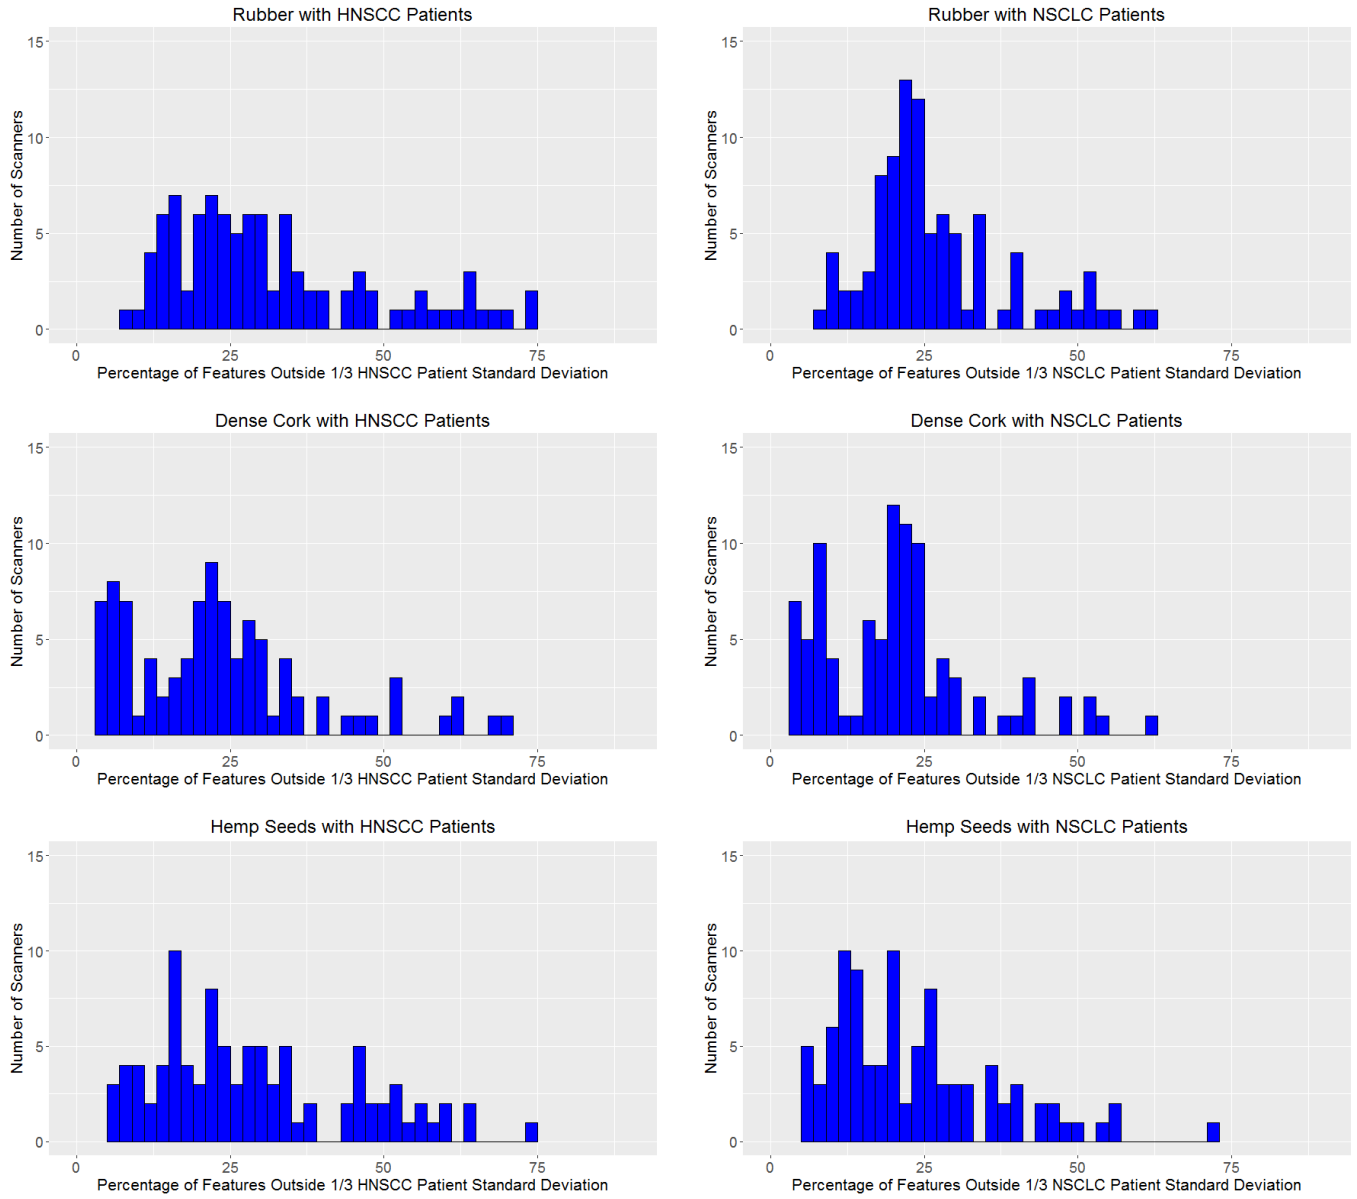

**Supplemental Figure 13.** The percentage of features outside 1/3 scaled patient standard deviation for rubber, dense cork, and hemp seeds using the head and neck squamous cell carcinoma (HNSCC) patient cohort and the non-small cell lung cancer (NSCLC) patient cohort. For all plots, there are a large percentage of features outside of a third of the scaled patient standard deviation.

**Table 3. Preprocessing and Features From Previous Studies Used for QA Analysis**

| <b>Preprocessing</b>                                 | <b>Feature Group</b> | <b>Feature</b>                       |
|------------------------------------------------------|----------------------|--------------------------------------|
| Thresholding and Smoothing                           | NGTDM                | Texture Strength                     |
| Thresholding and Smoothing                           | IH                   | Variance                             |
| Thresholding and Smoothing                           | IH                   | Standard Deviation                   |
| Thresholding and Smoothing                           | IH                   | Mean                                 |
| Thresholding and Smoothing                           | IH                   | Kurtosis                             |
| Thresholding, Smoothing, and Bit<br>Depth Resampling | IH                   | Entropy                              |
| Thresholding and Smoothing                           | IH                   | Energy                               |
| Thresholding and Smoothing                           | GLCM                 | Inverse Difference Norm              |
| Thresholding and Smoothing                           | GLCM                 | Inverse Difference Moment<br>Norm    |
| Thresholding                                         | GLCM                 | Information Measure<br>Correlation 1 |
| Thresholding                                         | GLCM                 | Information Measure<br>Correlation 2 |
| Thresholding and Smoothing                           | GLCM                 | Dissimilarity                        |
| Thresholding, Smoothing, and Bit<br>Depth Resampling | GLCM                 | Difference Entropy                   |
| Thresholding and Smoothing                           | GLCM                 | Contrast                             |
| Thresholding                                         | NGTDM                | Busyness                             |
| Thresholding                                         | IH                   | Kurtosis                             |

NGTDM: neighborhood gray tone difference matrix; IH: intensity histogram; GLCM: gray level co-occurrence matrix
